# Supplementary material for: The first solid composed of {As4V16O42(H2O)} clusters
Source: Royal Society of Chemistry journal article supplement (doi:10.1039/b806770h), 2008-01-01
Supplement: b806770h.pdf [file b806770h.pdf]

## Supporting Information

### The First Solid Composed of $\{\text{As}_4\text{V}_{16}\text{O}_{42}(\text{H}_2\text{O})\}$ Clusters

Shou-Tian Zheng,<sup>a</sup> Jie Zhang,<sup>a</sup> Bing Li,<sup>a,b</sup> and Guo-Yu Yang<sup>\*,a</sup>

<sup>a</sup> State Key Laboratory of Structural Chemistry, Fujian Institute of Research on the Structure of Matter, Chinese Academy of Sciences, Fuzhou, Fujian 350002 (China)

<sup>b</sup> Department of Chemistry, Zhejiang Forestry University, Lin'an, Zhejiang 311300 (China)

Figure S1. TG curve of **1**.

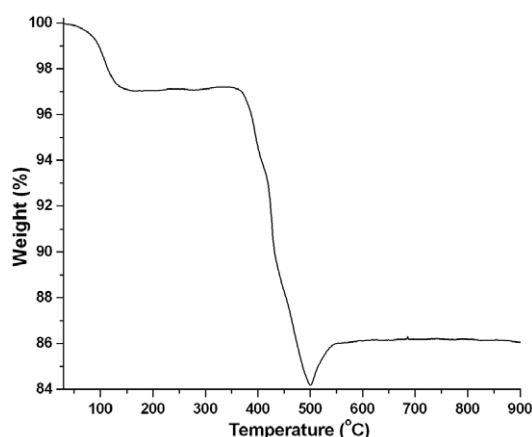

TGA of **1** shows two major steps of weight losses (Figure S1). The first weight loss of **1** corresponds to the removal of lattice water molecules at relatively lower temperature (below  $\sim 150$  °C). The remainder stages of **1** (in the range 400-500°C) are attributed to the loss of the organic ligands and the sublimation of part  $\text{As}_2\text{O}_3$  molecules. A weight gain was shown between 500 and 550 °C, which is consistent with the oxidation of V atoms from  $\text{V}^{4+}$  to  $\text{V}^{5+}$  and some of the As atoms from  $\text{As}^{3+}$  to  $\text{As}^{5+}$ .

Figure S2. Temperature dependence of  $\chi_m$  ( $\Delta$ ) and  $\chi_m T$  (O) values for **1**.

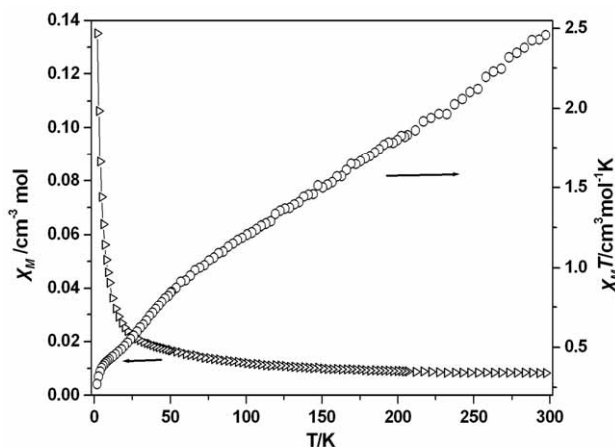

The variable temperature magnetic susceptibility of **1** was measured between 2 and 300 K. As shown in Figure S2, the  $\chi_M T$  value at 300 K is  $2.45 \text{ cm}^3 \text{ K mol}^{-1}$  ( $4.43 \mu_B$ ), much smaller than that expected value  $6.00 \text{ cm}^3 \text{ K mol}^{-1}$  ( $\mu_{\text{eff}} = 6.93 \mu_B$ ) for the sixteen uncoupled  $S = 1/2$  spins of  $\text{V}^{4+}$  atoms with  $g = 2$ . The  $\chi_M T$  value decreases nearly linearly with decreasing temperature from  $2.45 \text{ cm}^3 \text{ K mol}^{-1}$  at 300 K to  $0.41 \text{ cm}^3 \text{ K mol}^{-1}$  at 8 K, and then decreases rapidly from 8 K and reaches

Supplementary Material (ESI) for Dalton Transactions  
This journal is (c) The Royal Society of Chemistry 2008

a minimum value of  $0.27 \text{ cm}^3 \text{ Kmol}^{-1}$  at 2 K. The temperature-dependences of  $\chi_M T$  demonstrate the presence of strong antiferromagnetic coupling interactions, which is a common feature for most polyoxovanadates. (A. Müller, F. Peters, M. T. Pope, D. Gatteschi, *Chem. Rev.* **1998**, 98, 239). Unfortunately, it is too difficult to fit the experimental magnetic data of these extended heteropolymetallic spin system using a suitable theoretical model. (O. Kahn, *Molecular Magnetism*, VCH, Weinheim, Germany, **1993**)
